# Supplementary material for: Prognostic impact of programmed cell death-1 (PD-1) and PD-ligand 1 (PD-L1) expression in cancer cells and tumor-infiltrating lymphocytes in ovarian high grade serous carcinoma
Source: PubMed Central journal article supplement (PMC4811475; doi:10.18632/oncotarget.6429), 2015-11-29
Supplement: oncotarget-07-1486-s001.pdf [file oncotarget-07-1486-s001.pdf]

# Prognostic impact of programmed cell death-1 (PD-1) and PD-ligand 1 (PD-L1) expression on cancer cells and tumor-infiltrating lymphocytes in ovarian high grade serous carcinoma

## Supplementary Material

A

| Staining intensity | Score |
|--------------------|-------|
| Negative           | 0     |
| Weak               | 1     |
| Moderate           | 2     |
| strong             | 3     |

  

| Percentage of stained cancer cells | Score |
|------------------------------------|-------|
| 0%                                 | 0     |
| 1-10%                              | 1     |
| 11-50%                             | 2     |
| 51-80%                             | 3     |
| 81-100%                            | 4     |

**Immunoreactivity Score (IRS) = score<sub>intensity</sub> X score<sub>percentage</sub>**

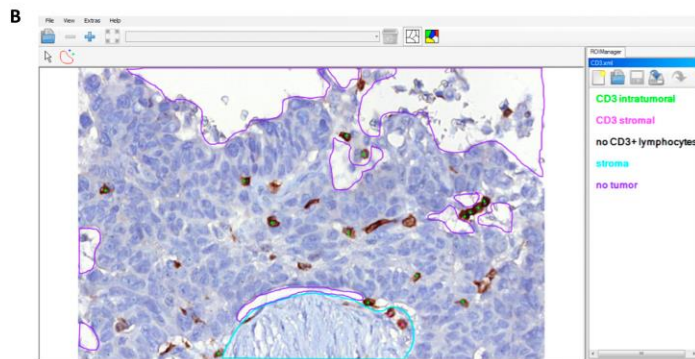

**Suppl. Fig. S1** Illustration of PD-1 and PD-L1 immunohistochemical staining in cancer cells and TILs.: Multiplication of staining intensity score and score for the percentage of stained cells results in the immunoreactivity score (IRS), ranging from 0 to 12 **(A)**. Screenshot from the ROI Manager showing the quantification of CD3+ TILs in an ovarian carcinoma microphotograph: stromal areas are labelled in turquoise, non-tissue areas in blue, intratumoral TILs in green, stromal TILs in pink **(B)**

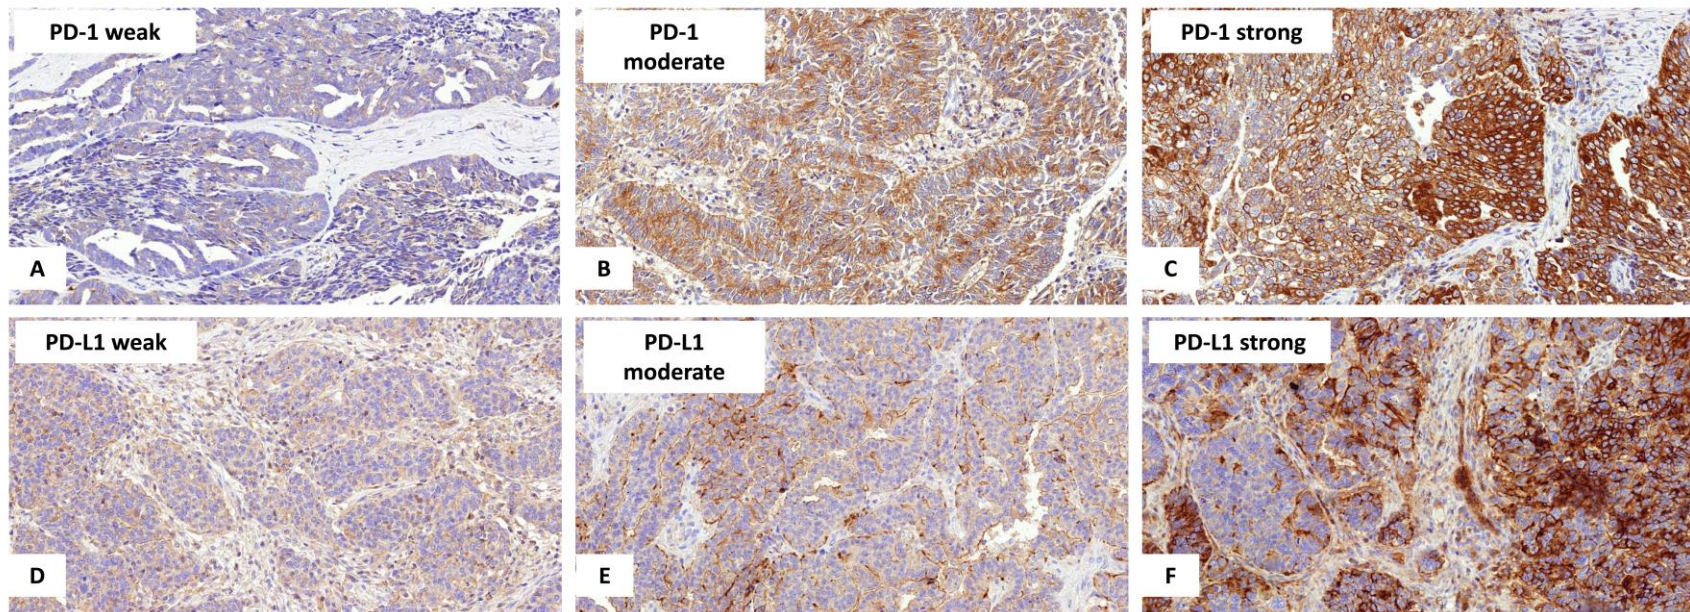

**Suppl. Fig. S2** Examples for cancer cell immunohistochemical staining in varying intensities: PD-1 **(A-C)**, PD-L1 **(D-F)**

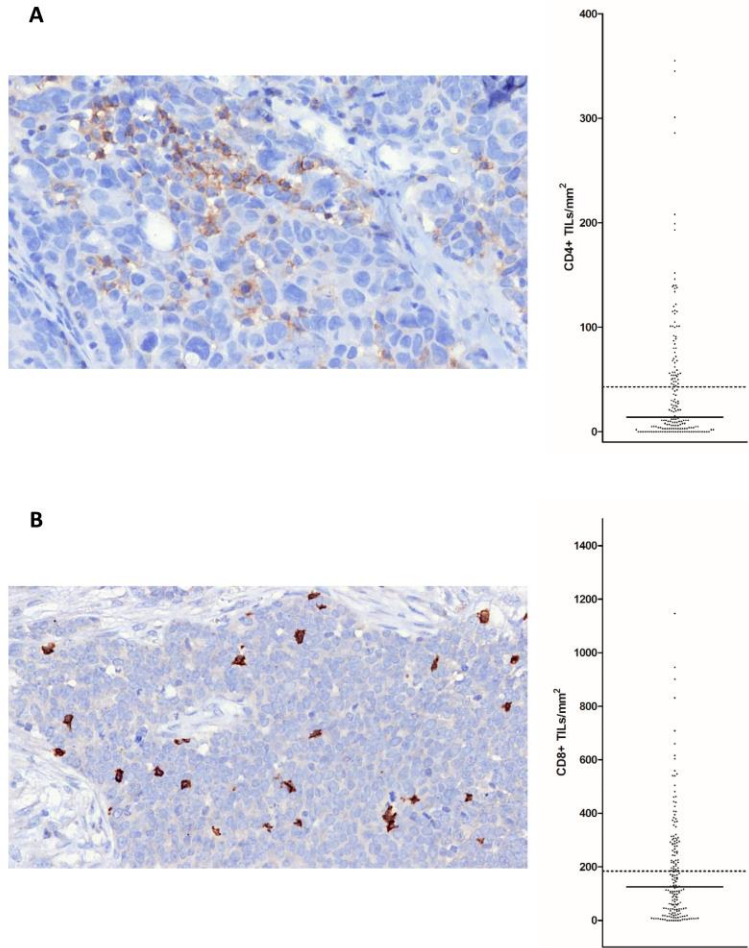

**Suppl. Fig. S3** Distribution of CD4+ and CD8+ TILs: Immunohistochemical staining of CD4+ **(A)** and CD8+ **(B)** TILs. The diagrams on the right show the distribution of TILs/mm<sup>2</sup> tumor area (bars: median, dotted lines: means).

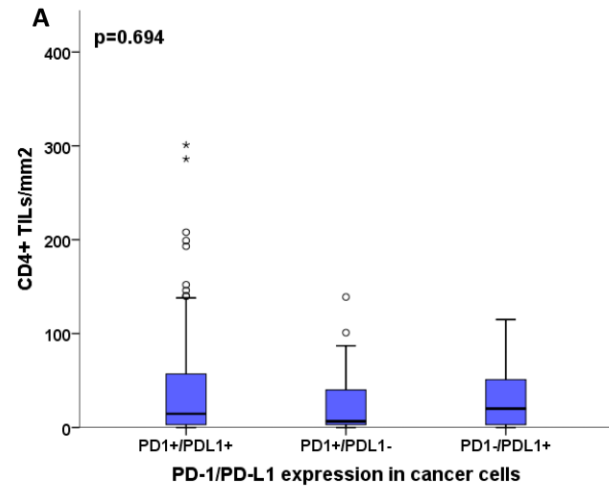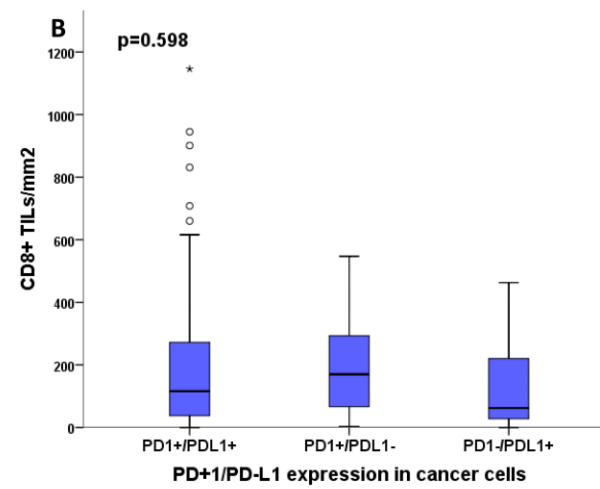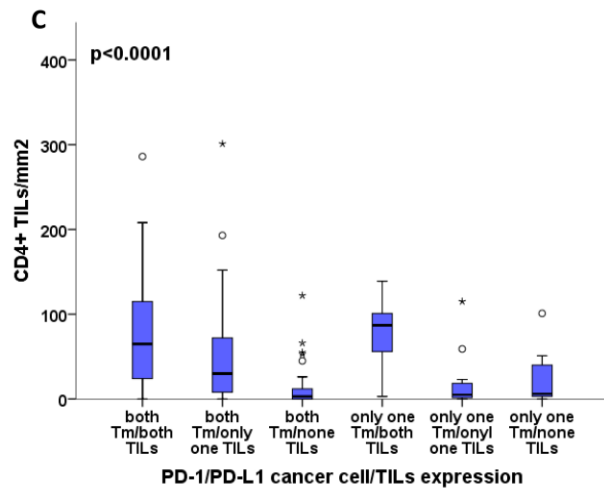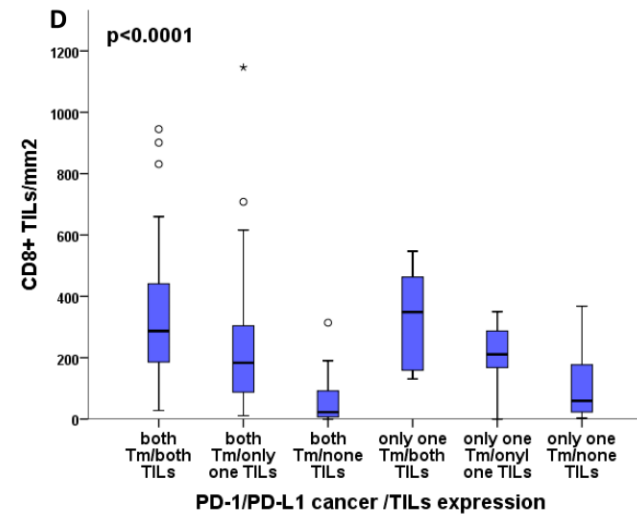

**Suppl. Fig. 4** Interaction of CD4+ and CD8+ TILs with PD-1 and PD-L1 expression: Dependence of CD4+ **(A)** and CD8+ **(B)** TILs from combined PD-1 and PD-L1 expression in cancer cells. Dependence of CD4+ **(C)** and CD8+ **(D)** TILs from combined PD-1 and PD-L1 expression in cancer cells as well as in TILs.

(bars: median, box: interquartile range (IQR), whiskers: 1,5×IQR, dots and stars: outliers, p: Kruskal-Wallis test)



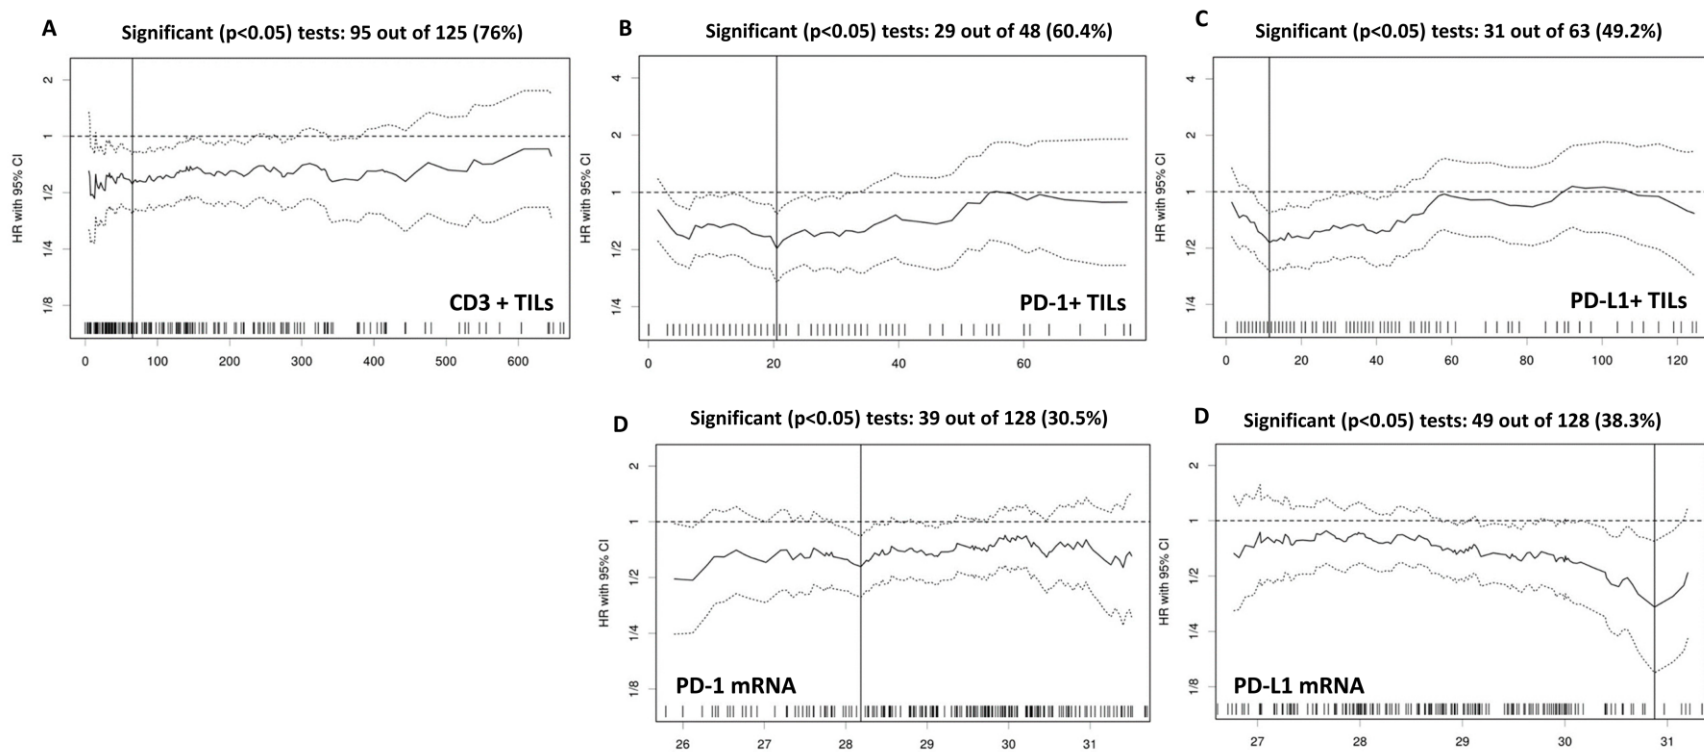

**Suppl. Fig. S5** Cutoff point determination using Cutoff Finder ([molpath.charite.de/cutoff/](http://molpath.charite.de/cutoff/)): Hazard ratios (HR) are plotted against each possible cutoff point (CI: 95% confidence interval). Numbers and rates of significant cutoff points are indicated above each diagram: PFS according to CD3+ TILs **(A)**. PFS according to PD-1+ TILs **(B)**. PFS according to PD-L1+ TILs **(C)**. PFS according to PD-1 mRNA expression **(D)**. PFS according to PD-L1 mRNA expression **(E)**.

**Supplemental Table S1: Survival Analysis - Overall survival**

|                                              | <i>univariate</i>         |                              |              | <i>multivariate</i> |       |
|----------------------------------------------|---------------------------|------------------------------|--------------|---------------------|-------|
|                                              | no of events/ no of cases | median survival, months (SE) | p (log rank) | HR (95% CI)         | p     |
| <b>PD-1 in tumor cells (membranous)</b>      |                           |                              |              |                     |       |
| Negative                                     | 18/ 22                    | 46.95 (8.7)                  |              | 1                   |       |
| positive                                     | 87/ 179                   | 51.45 (9.3)                  | 0.059        | 0.79 (0.46-1.37)    | 0.400 |
| <b>PD-L1 in tumor cells (membranous)</b>     |                           |                              |              |                     |       |
| Negative                                     | 18/ 24                    | 37.91 (3.9)                  |              | 1                   |       |
| positive                                     | 88/ 178                   | 50.63 (8.3)                  | 0.045        | 0.51 (0.28-0.91)    | 0.023 |
| <b>PD-1/PD-L1 in tumor cells combination</b> |                           |                              |              |                     |       |
| PD-1+/PD-L1+                                 | 74/ 159                   | 65.68 (10.6)                 |              | 1                   |       |
| PD-1+/PD-L1-                                 | 15/ 21                    | 37.91 (3.6)                  |              | 2.28 (1.23-4.33)    |       |
| PD-1-/PD-L1+                                 | 14/ 18                    | 47.74 (1.5)                  |              | 1.18 (0.64-2.17)    |       |
| PD-1-/PD-L1-                                 | 2/ 2                      | 23.62 (-)                    | 0.051        | 3.07 (0.40-23.31)   | 0.065 |
| <b>CD3+ TILs/mm<sup>2</sup></b>              |                           |                              |              |                     |       |
| <=65                                         | 43/ 72                    | 40.05 (2.7)                  |              | 1                   |       |
| > 65                                         | 61/ 128                   | 66.83 (9.0)                  | 0.003        | 0.63 (0.40-1.00)    | 0.037 |
| <b>PD-1+ TILs/mm<sup>2</sup></b>             |                           |                              |              |                     |       |
| <=11                                         | 57/ 97                    | 42.51 (3.6)                  |              | 1                   |       |
| >11                                          | 47/ 103                   | 68.37 (9.4)                  | 0.012        | 0.58 (0.37-0.91)    | 0.018 |
| <b>PD-L1+ TILs/mm<sup>2</sup></b>            |                           |                              |              |                     |       |
| <=20                                         | 81/ 140                   | 44.45 (2.77)                 |              | 1                   |       |
| >20                                          | 23/ 60                    | 96.10 (-)                    | 0.011        | 0.73 (0.44-1.20)    | 0.214 |
| <b>PD-1/CD3 TILs combination</b>             |                           |                              |              |                     |       |
| CD3+ TILs low                                | 43/72                     | 40.05 (2.8)                  |              | 1                   |       |
| CD3+ TILs high/PD-1+ TILs low                | 20/32                     | 47.74 (9.1)                  |              | 1.02 [0.53-1.96]    |       |
| CD3+ TILs high/PD-1+ TILs high               | 41/96                     | 71.23 (13.4)                 | 0.004        | 0.54 (0.33-.087)    | 0.023 |
| <b>PD-L1/CD3 TILs combination</b>            |                           |                              |              |                     |       |
| CD3+ TILs low                                | 43/72                     | 40.05 (2.7)                  |              | 1                   |       |
| CD3+ TILs high/PD-L1+ TILs low               | 39/70                     | 65.31 (11.0)                 | 0.004        | 0.64 (0.39-1.06)    |       |
| CD3+ TILs high/PD-L1+ TILs high              | 22/58                     | Not reached                  |              | 0.58 (0.32-1.03)    | 0.106 |
| <b>PD-1 mRNA (40 – deltaCT)</b>              |                           |                              |              |                     |       |
| <=28.18                                      | 33/51                     | 42.19 (4.6)                  |              | 1                   |       |
| >28.18                                       | 70/149                    | 65.31 (10.9)                 | 0.036        | 0.65 (0.40-0.98)    | 0.042 |
| <b>PD-L1 mRNA (40 – deltaCT)</b>             |                           |                              |              |                     |       |
| <=29.99                                      | 92/166                    | 46.49 (3.3)                  |              | 1                   |       |
| >29.99                                       | 14/37                     | Not reached                  | 0.045        | 0.55 (0.30-0.99)    | 0.047 |
| <b>PD-1/PD-L1 mRNA combination</b>           |                           |                              |              |                     |       |

|                |        |              |       |                  |       |
|----------------|--------|--------------|-------|------------------|-------|
| PD-1+/PD-L1+   | 13/36  | Not reached  |       | 1                |       |
| PD1+ or PD-L1+ | 58/114 | 50.63 (11.0) |       | 1.69 (0.89-3.21) |       |
| PD-1-/PD-L1-   | 31/49  | 42.86 (4.4)  | 0.045 | 2.31 (1.16-4.61) | 0.056 |

SE: standard error; HR: hazard ratio; CI: confidence interval; for each marker multivariate analysis was performed including age (<=60 vs > 60 years), stage (FIGO I/II vs III/IV), and residual tumor (none vs any)



**Supplemental Table S2: Summary: Progression-Free Survival in Subgroup with Platinum-Based Chemotherapy**

|                                              | <i>univariate</i>         |                         |              | <i>multivariate</i> |       |
|----------------------------------------------|---------------------------|-------------------------|--------------|---------------------|-------|
|                                              | no of events/ no of cases | median survival, months | p (log rank) | HR                  | p     |
| <b>PD-1 in tumor cells (membranous)</b>      |                           |                         |              |                     |       |
| Negative                                     | 18/19                     | 14.46 (2.4)             |              | 1                   |       |
| positive                                     | 86/124                    | 25.53 (2.7)             | 0.007        | 0.57                | 0.035 |
| <b>PD-L1 in tumor cells (membranous)</b>     |                           |                         |              |                     |       |
| Negative                                     | 18/19                     | 14.13 (1.6)             |              | 1                   |       |
| positive                                     | 87/125                    | 25.69 (2.6)             | 0.002        | 0.41                | 0.001 |
| <b>PD-1/PD-L1 in tumor cells combination</b> |                           |                         |              |                     |       |
| PD-1+/PD-L1+                                 | 72/109                    | 26.88 (3.2)             |              | 1                   |       |
| PD-1+/PD-L1-                                 | 16/17                     | 14.13 (5.1)             |              | 2.68                |       |
| PD-1-/PD-L1+                                 | 15/16                     | 15.11 (3.9)             |              | 1.78                |       |
| PD-1-/PD-L1-                                 | 1/1                       | 15.31 (-)               | 0.002        | 2.23                | 0.004 |
| <b>CD3+ TILs/mm<sup>2</sup></b>              |                           |                         |              | 1                   |       |
| <=65                                         | 42/49                     | 16.46 (2.3)             |              | 0.63                | 0.031 |
| > 65                                         | 61/93                     | 28.88 (2.8)             | 0.005        |                     |       |
| <b>PD-1+ TILs/mm<sup>2</sup></b>             |                           |                         |              | 1                   |       |
| <=11                                         | 55/66                     | 16.46 (2.2)             |              | 0.63                | 0.005 |
| >11                                          | 48/76                     | 31.11 (4.9)             | 0.002        |                     |       |
| <b>PD-L1+ TILs/mm<sup>2</sup></b>            |                           |                         |              | 1                   |       |
| <=20                                         | 80/103                    | 20.24 (2.0)             |              | 0.72                | 0.055 |
| >20                                          | 23/39                     | 33.05 (4.8)             | 0.008        |                     |       |
| <b>PD-1/CD3 TILs combination</b>             |                           |                         |              | 1                   |       |
| CD3+ TILs low                                | 42/49                     | 16.46 (2.3)             |              | 0.72                |       |
| CD3+ TILs high/PD-1+ TILs low                | 16/21                     | 17.41 (5.0)             |              | 0.53                | 0.031 |
| CD3+ TILs high/PD-1+ TILs high               | 45/72                     | 31.11 (5.1)             | 0.006        |                     |       |
| <b>PD-L1/CD3 TILs combination</b>            |                           |                         |              | 1                   |       |
| CD3+ TILs low                                | 42/49                     | 16.46 (2.3)             |              | 0.71                |       |
| CD3+ TILs high/PD-L1+ TILs low               | 39/56                     | 24.74 (5.0)             | 0.006        | 0.61                | 0.064 |
| CD3+ TILs high/PD-L1+ TILs high              | 22/37                     | 33.05 (4.9)             |              |                     |       |
| <b>PD-1 mRNA (40 – deltaCT)</b>              |                           |                         |              | 1                   |       |
| <=28.18                                      | 35/38                     | 15.11 (2.1)             |              | 0.46                | 0.001 |
| >28.18                                       | 67/104                    | 27.57 (2.8)             | 0.002        |                     |       |
| <b>PD-L1 mRNA (40 – deltaCT)</b>             |                           |                         |              | 1                   |       |
| <=30.45                                      | 87/116                    | 20.70 (2.5)             |              | 0.41                | 0.002 |
| >30.45                                       | 17/28                     | 35.81 (9.2)             | 0.020        |                     |       |
| <b>PD-1/PD-L1 mRNA combination</b>           |                           |                         |              |                     |       |

|                |       |             |       |      |         |
|----------------|-------|-------------|-------|------|---------|
| PD1+/PD-L1+    | 16/27 | 35.81 (7.5) |       | 1    |         |
| PD1+ or PD-L1+ | 52/78 | 26.12 (3.9) |       | 2.07 |         |
| PD1-/PD-L1-    | 33/36 | 15.11 (2.0) | 0.003 | 3.69 | <0.0001 |

SE: standard error; HR: hazard ratio; CI: confidence interval; for each marker multivariate analysis was performed including age (<=60 vs > 60 years), stage (FIGO I/II vs III/IV), and residual tumor (none vs any)

**Supplemental Table S3: Summary: Progression-Free Survival in Subgroup with Platinum-Based Chemotherapy and no Residual Tumor**

|                                              | <i>univariate</i>         |                         |              | <i>multivariate</i> |         |
|----------------------------------------------|---------------------------|-------------------------|--------------|---------------------|---------|
|                                              | no of events/ no of cases | median survival, months | p (log rank) | HR                  | p       |
| <b>PD-1 in tumor cells (membranous)</b>      |                           |                         |              |                     |         |
| Negative                                     | 10/11                     | 12.5 (2.8)              |              | 1                   |         |
| positive                                     | 57/77                     | 26.9 (3.4)              | 0.010        | 0.48                | 0.040   |
| <b>PD-L1 in tumor cells (membranous)</b>     |                           |                         |              |                     |         |
| Negative                                     | 12/12                     | 13.4 (0.9)              |              | 1                   |         |
| positive                                     | 56/77                     | 27.6 (2.3)              | 0.001        | 0.30                | <0.0001 |
| <b>PD-1/PD-L1 in tumor cells combination</b> |                           |                         |              |                     |         |
| PD-1+/PD-L1+                                 | 48/68                     | 27.57 (2.8)             |              | 1                   |         |
| PD-1+/PD-L1-                                 | 11/11                     | 14.13 (4.8)             |              | 3.4                 |         |
| PD-1-/PD-L1+                                 | 8/9                       | 14.46 (2.9)             |              | 1.9                 |         |
| PD-1-/PD-L1-                                 | 0                         | -                       | 0.001        | -                   | 0.001   |
| <b>CD3+ TILs/mm<sup>2</sup></b>              |                           |                         |              |                     |         |
| <=65                                         | 24/27                     | 20.24 (3.5)             |              | 1                   |         |
| > 65                                         | 42/60                     | 29.18 (3.0)             | 0.005        | 0.53                | 0.018   |
| <b>PD-1+ TILs/mm<sup>2</sup></b>             |                           |                         |              |                     |         |
| <=11                                         | 33/38                     | 17.41 (2.0)             |              | 1                   |         |
| >11                                          | 33/49                     | 31.11 (3.0)             | 0.002        | 0.41                | 0.001   |
| <b>PD-L1+ TILs/mm<sup>2</sup></b>            |                           |                         |              |                     |         |
| <=20                                         | 49/60                     | 20.70 (3.4)             |              | 1                   |         |
| >20                                          | 17/27                     | 31.28 (3.0)             | 0.032        | 0.56                | 0.061   |
| <b>PD-1/CD3 TILs combination</b>             |                           |                         |              |                     |         |
| CD3+ TILs low                                | 24/27                     | 20.24 (3.5)             |              | 1                   |         |
| CD3+ TILs high/PD-1+ TILs low                | 11/14                     | 17.41 (4.2)             |              | 0.85                |         |
| CD3+ TILs high/PD-1+ TILs high               | 31/46                     | 31.11 (5.9)             | 0.009        | 0.47                | 0.025   |
| <b>PD-L1/CD3 TILs combination</b>            |                           |                         |              |                     |         |
| CD3+ TILs low                                | 24/27                     | 20.24 (3.1)             |              | 1                   |         |
| CD3+ TILs high/PD-L1+ TILs low               | 25/34                     | 28.88 (7.1)             |              | 0.59                | 0.046   |
| CD3+ TILs high/PD-L1+ TILs high              | 17/26                     | 31.28 (4.68)            | 0.012        | 0.46                |         |

|                                    |       |              |       |      |       |
|------------------------------------|-------|--------------|-------|------|-------|
| <b>PD-1 mRNA (40 – deltaCT)</b>    |       |              |       |      |       |
| <=28.18                            | 8/8   | 11.34 (2.4)  |       | 1    |       |
| >28.18                             | 21/31 | 21.22 (2.2)  | 0.011 | 0.53 | 0.012 |
| <b>PD-L1 mRNA (40 – deltaCT)</b>   |       |              |       |      |       |
| <=30.45                            | 57/70 | 20.7 (3.3)   |       | 1    |       |
| >30.45                             | 9/18  | 43.2 (3.0)   | 0.005 | 0.36 | 0.004 |
| <b>PD-1/PD-L1 mRNA combination</b> |       |              |       |      |       |
| PD1+/PD-L1+                        | 8/17  | 38.74 (-)    |       | 1    |       |
| PD1+ or PD-L1+                     | 33/44 | 27.43 (5.38) |       | 2.6  |       |
| PD1-/PD-L1-                        | 24/26 | 16.46 (3.61) | 0.006 | 3.8  | 0.015 |

SE: standard error; HR: hazard ratio; CI: confidence interval; for each marker multivariate analysis was performed including age (<=60 vs > 60 years), and stage (FIGO I/II vs III/IV)
